# Supplementary material
Source: MDPI journal article supplement (https://www.mdpi.com/2077-1312/9/5/480)
Supplement: s1 [file s1]

## Supplementary

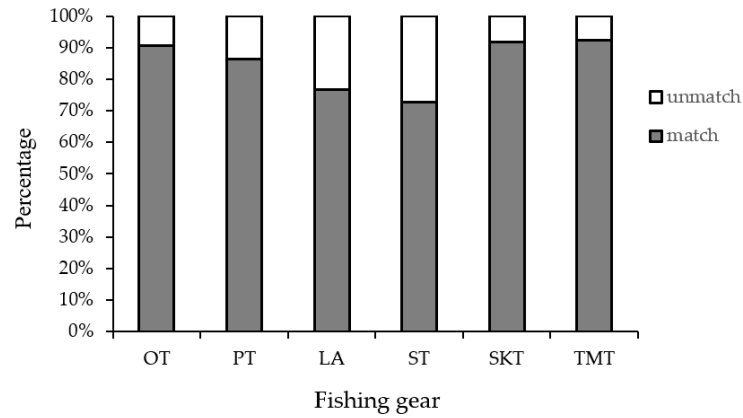

**Figure 1.** The percentage of landing data that matched with the VDR records for trips by fishing gear in the study period.

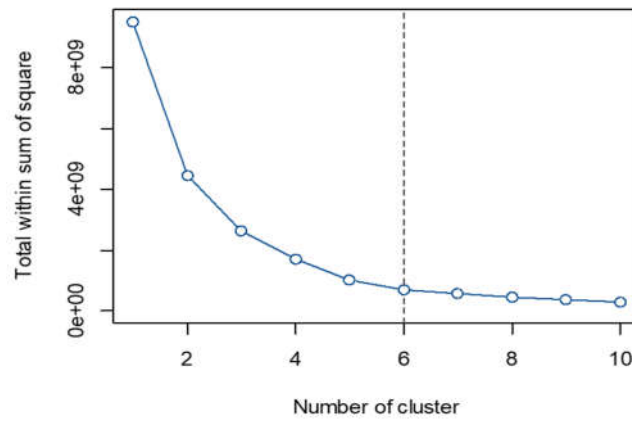

**Figure 2.** The scree plot of within cluster distance sum of squares.

(a)

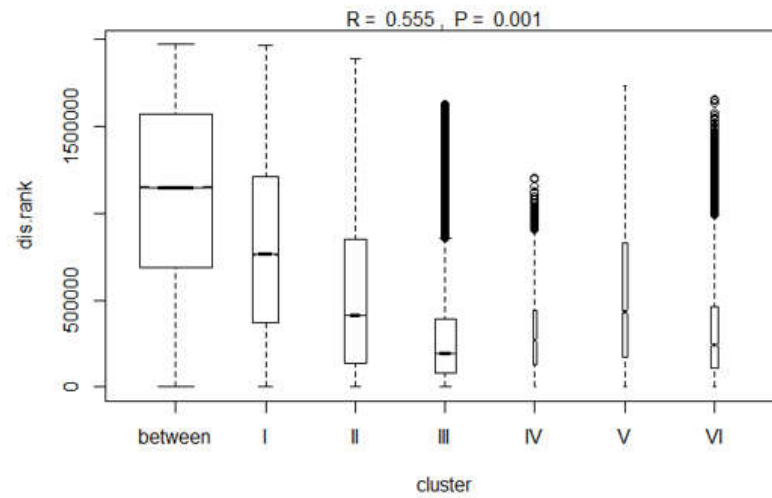

(b)

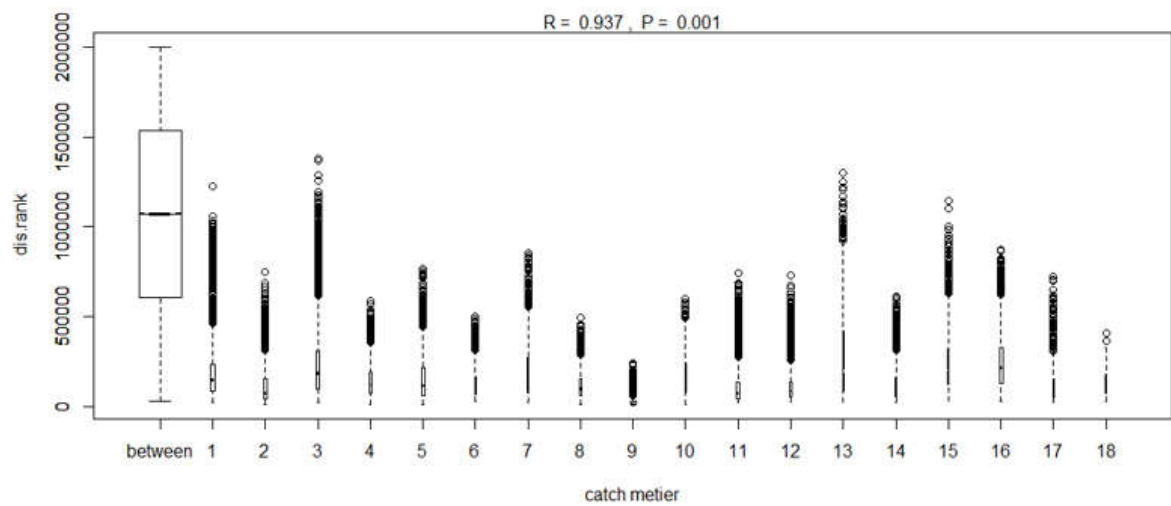

**Figure 3.** ANOSIM plot of the (a) 6 target group clusters and (b) 18 catch métiers with statistic  $R$  and  $p$ -value based on catch composition in landing data.

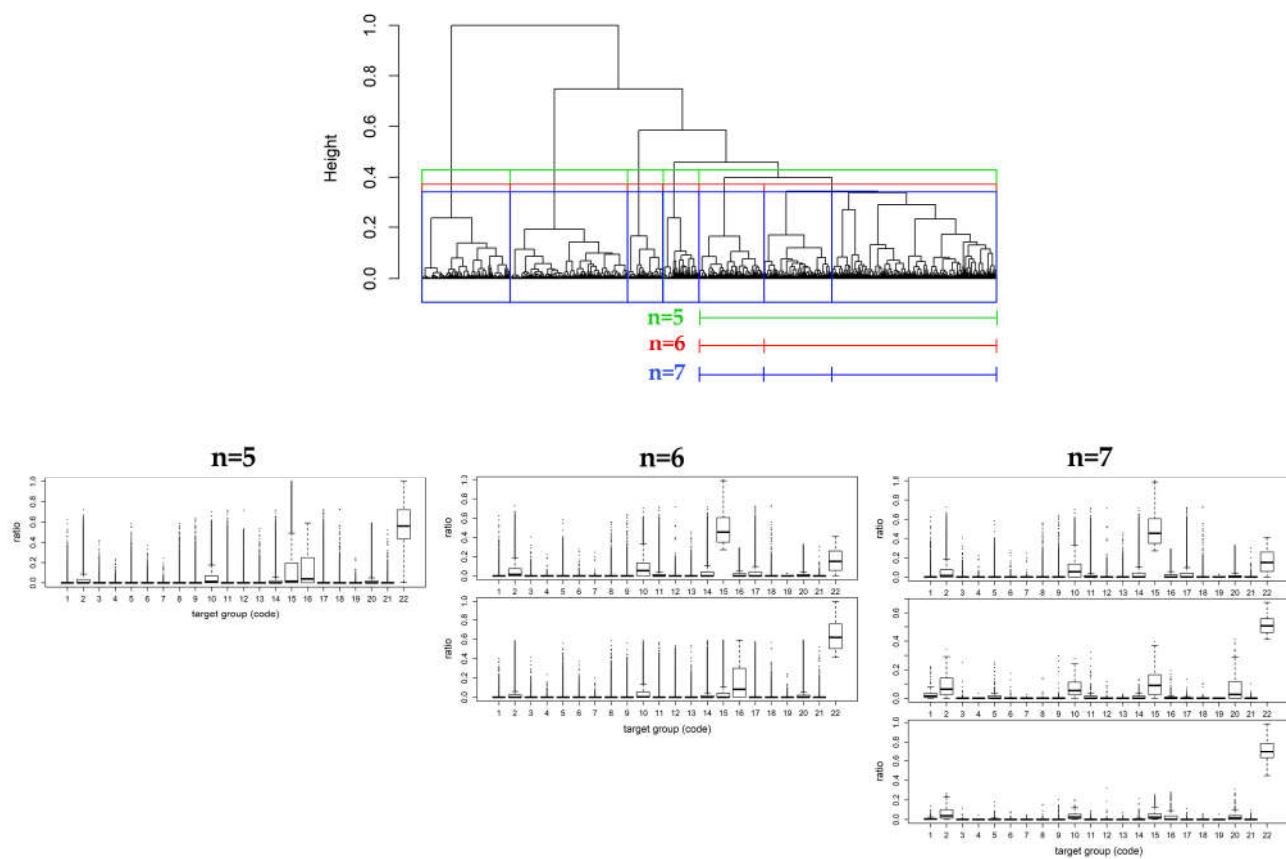

**Figure 4.** Diagram of change of target group composition profiles from different cluster numbers. The 6 clusters were determined to clearly separate the trips that mainly target cephalopods (code 15) and miscellaneous (code 22).

step 1

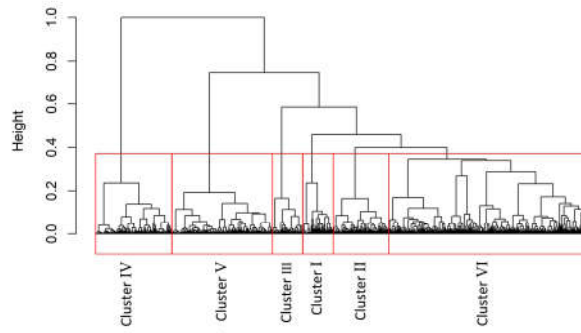

step 2

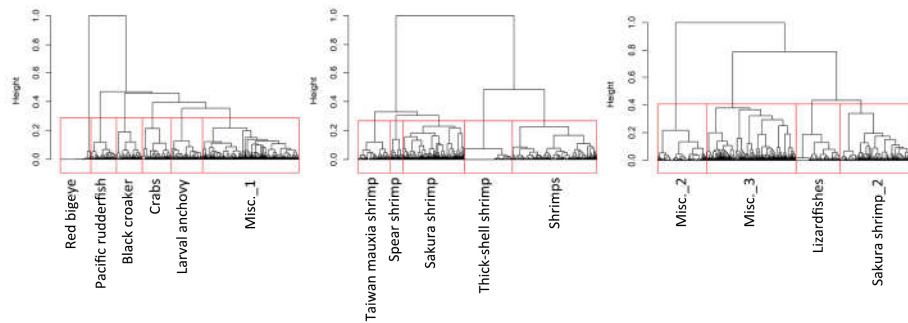

**Figure 5.** Diagram of the two-step clustering process. We determined 6 clusters and interpreted the group of trips to target homogenous fishery resources (low-resolution data of target group) in the first step. Given the huge number of trips and fuzzy hidden catch information in Clusters IV, V, and VI, cluster analysis was conducted using species composition in the second step.

**Table 1.** The species for the target group of the trawler fishery in coastal and offshore water off Taiwan. Target groups aggregated homogeneous species according to taxonomy (target group code 1-21). Species with low economic value but frequently caught are shown in the miscellaneous group (code 22). Main fishery resources are presented for the trawler fishery.

| Code | Target Group    | Common Name            | Scientific Name              |
|------|-----------------|------------------------|------------------------------|
| 1    | Mackerels       | Blue mackerel          | <i>Scomber australasicus</i> |
|      |                 | Chub mackerel          | <i>Scomber japonicus</i>     |
|      |                 | Other mackerels        | Scombridae                   |
| 2    | Jacks and scads | Black pomfret          | <i>Parastromateus niger</i>  |
|      |                 | Greater amberjack      | <i>Seriola dumerili</i>      |
|      |                 | Japanese jack mackerel | <i>Trachurus japonicus</i>   |
|      |                 | Japanese scad          | <i>Decapterus maruadsi</i>   |
|      |                 | Redtail scad           | <i>Decapterus kurroides</i>  |
|      |                 | Scomberoides           | <i>Scomberoides</i> spp.     |
|      |                 | Shrimp scad            | <i>Alepes djedaba</i>        |
|      |                 | Snubnose pompano       | <i>Trachinotus blochii</i>   |
| 3    | Bonitos         | Torpedo scad           | <i>Megalaspis cordyla</i>    |
|      |                 | Other jack and scads   | Carangidae                   |
|      |                 | Bullet tuna            | <i>Auxis rochei</i>          |
|      |                 | Frigate tuna           | <i>Auxis thazard</i>         |
|      |                 | Skipjack tuna          | <i>Katsuwonus pelamis</i>    |
|      |                 | Other bonitos          | Scombridae                   |

|    |                        |                                |                                   |
|----|------------------------|--------------------------------|-----------------------------------|
| 4  | Tunas                  | Albacore                       | <i>Thunnus alalunga</i>           |
|    |                        | Bigeye tuna                    | <i>Thunnus obesus</i>             |
|    |                        | Southern bluefin tuna          | <i>Thunnus maccoyii</i>           |
|    |                        | Yellowfin tuna                 | <i>Thunnus albacares</i>          |
|    |                        | Other tunas                    | Scombridae                        |
| 5  | Seer fish              | Indo-Pacific king mackerel     | <i>Scomberomorus guttatus</i>     |
|    |                        | Japanese spanish mackerel      | <i>Scomberomorus niphonius</i>    |
|    |                        | Korean seerfish                | <i>Scomberomorus koreanus</i>     |
|    |                        | Narrow-barred Spanish mackerel | <i>Scomberomorus commerson</i>    |
|    |                        | Other seer fish                | Scombridae                        |
| 6  | Marlins                | Black marlin                   | <i>Istiompax indica</i>           |
|    |                        | Blue marlin                    | <i>Makaira nigricans</i>          |
|    |                        | Indo-Pacific sailfish          | <i>Istiophorus platypterus</i>    |
|    |                        | Striped marlin                 | <i>Kajikia audax</i>              |
|    |                        | Swordfish                      | <i>Xiphias gladius</i>            |
| 7  | Dolphinfish            | Other marlins                  | Istiophoridae                     |
|    |                        | Dolphin fish                   | <i>Coryphaena hippurus</i>        |
| 8  | Sharks                 | Blue shark                     | Prionace glauca                   |
|    |                        | Hammerhead                     | Sphyrnidae                        |
|    |                        | Requiem sharks                 | <i>Carcharhinus</i> spp.          |
|    |                        | Shortfin mako                  | <i>Isurus oxyrinchus</i>          |
|    |                        | Thresher sharks                | Alopiidae                         |
| 9  | Rays and skates        | Other sharks                   | Selachimorpha                     |
|    |                        | Rays and skates                | Dasyatidae; Rajidae; Myliobatidae |
| 10 | Seabreams and snappers | Blackhead seabream             | <i>Acanthopagrus schlegelii</i>   |
|    |                        | Crimson snapper                | <i>Lutjanus erythropterus</i>     |
|    |                        | Emperors                       | Lethrinidae                       |
|    |                        | Flame snapper                  | <i>Etelis coruscans</i>           |
|    |                        | Fusiliers                      | Caesionidae                       |
|    |                        | Goatfishes                     | Mullidae                          |
|    |                        | Jarboa terapon                 | <i>Terapon jarbua</i>             |
|    |                        | Mangrove red snapper           | <i>Lutjanus argentimaculatus</i>  |
|    |                        | Parrotfishes                   | Scaridae                          |
|    |                        | Red bigeye                     | <i>Priacanthus macracanthus</i>   |
|    |                        | Red seabream                   | <i>Pagrus major</i>               |
|    |                        | Rock porgy                     | <i>Oplegnathus punctatus</i>      |
|    |                        | Silver seabream                | <i>Rhabdosargus sarba</i>         |
|    |                        | Star snapper                   | <i>Lutjanus stellatus</i>         |
|    |                        | Threadfin porgy                | <i>Evynnis cardinalis</i>         |
| 11 | Butterfishes           | Yellowback seabream            | <i>Dentex hypselosomus</i>        |
|    |                        | Yellowfin seabream             | <i>Acanthopagrus latus</i>        |
|    |                        | Other seabreams                | Sparidae                          |
|    |                        | Other snappers                 | Lutjanidae                        |
|    |                        | Butterfish                     | <i>Pampus echinogaster</i>        |

|    |                        |                             |                                                                                                    |
|----|------------------------|-----------------------------|----------------------------------------------------------------------------------------------------|
|    |                        | Pacific rudderfish          | <i>Psenopsis anomala</i>                                                                           |
|    |                        | Silver pomfret              | <i>Pampus argenteus</i>                                                                            |
|    |                        | Other butterfishes          | Stromateidae                                                                                       |
|    |                        | Gizzard shad                | <i>Nematalosa</i> spp.                                                                             |
|    |                        | Larval anchovy              | <i>Engraulis japonicus</i> ;<br><i>Encrasicholina punctifer</i> ; <i>Encrasicholina heteroloba</i> |
| 12 | Anchovies and sardines | Red-eye round herring       | <i>Etrumeus teres</i>                                                                              |
|    |                        | Sardines                    | <i>Sardinella</i> spp.                                                                             |
|    |                        | Silver-stripe round herring | <i>Spratelloides gracilis</i>                                                                      |
|    |                        | Other herrings & sardines   | Clupeidae                                                                                          |
|    |                        | Brown-marbled grouper       | <i>Epinephelus fuscoguttatus</i>                                                                   |
|    |                        | Giant grouper               | <i>Epinephelus lanceolatus</i>                                                                     |
| 13 | Groupers               | Malabar grouper             | <i>Epinephelus malabaricus</i>                                                                     |
|    |                        | Orange-spotted grouper      | <i>Epinephelus coioides</i>                                                                        |
|    |                        | Other groupers              | Serranidae                                                                                         |
|    |                        | Black croaker               | <i>Atrubucca nibe</i>                                                                              |
|    |                        | Large yellow croaker        | <i>Larimichthys crocea</i>                                                                         |
|    |                        | Mi-iuy croaker              | <i>Miichthys miiuy</i>                                                                             |
| 14 | Croakers               | Silver croaker              | <i>Pennahia argentata</i> ;<br><i>Argyrosomus japonicus</i>                                        |
|    |                        | Tigertooth croaker          | <i>Otolithes ruber</i>                                                                             |
|    |                        | Yellow croaker              | <i>Larimichthys polyactis</i>                                                                      |
|    |                        | Other croakers              | Sciaenidae                                                                                         |
|    |                        | Argentine shortfin squid    | <i>Illex argentinus</i>                                                                            |
|    |                        | Bigfin reef squid           | <i>Sepioteuthis lessoniana</i>                                                                     |
| 15 | Cephalopods            | Cuttlefishes                | Sepiidae                                                                                           |
|    |                        | Jumbo squid                 | <i>Dosidicus gigas</i>                                                                             |
|    |                        | Neritic squid               | Loliginidae                                                                                        |
|    |                        | Octopus                     | Octopodidae                                                                                        |
|    |                        | Squids                      | Ommastrephidae                                                                                     |
|    |                        | Big head shrimp             | <i>Solenocera alticarinata</i>                                                                     |
|    |                        | Grass shrimp                | <i>Penaeus monodon</i>                                                                             |
|    |                        | Kuruma shrimp               | <i>Penaeus japonicus</i>                                                                           |
|    |                        | Lobsters                    | Palinuridae                                                                                        |
|    |                        | Red tail shrimp             | <i>Penaeus penicillatus</i>                                                                        |
|    |                        | Sakura shrimp               | <i>Lucensosergia lucens</i>                                                                        |
| 16 | Shrimps                | Sand shrimp                 | <i>Metapenaeus ensis</i>                                                                           |
|    |                        | Slipper lobster             | <i>Ibacus ciliatus</i>                                                                             |
|    |                        | Southern rough shrimp       | <i>Trachysalambria curvirostris</i>                                                                |
|    |                        | Spear shrimp                | <i>Parapenaeus</i> spp.                                                                            |
|    |                        | Taiwan mauxia shrimp        | <i>Acetes intermedius</i>                                                                          |

|    |                       |                          |                                |
|----|-----------------------|--------------------------|--------------------------------|
|    |                       | Thick-shell shrimp       | <i>Metapenaeopsis barbata</i>  |
|    |                       | Whiteleg shrimp          | <i>Penaeus vannamei</i>        |
|    |                       | Other shrimps            |                                |
|    |                       | Blue swimming crab       | <i>Portunus pelagicus</i>      |
|    |                       | Crucifix crab            | <i>Charybdis feriatus</i>      |
|    |                       | Mud crab                 | <i>Scylla serrata</i>          |
| 17 | Crabs                 | Spanner crab             | <i>Ranina ranina</i>           |
|    |                       | Three-spot swimming crab | <i>Portunus sanguinolentus</i> |
|    |                       | Other crabs              |                                |
| 18 | Ocean sunfish         | Molas                    | Molidae                        |
| 19 | Snake mackerels       | Snake mackerel           | Gempylidae                     |
| 20 | Hairtails             | Hairtails                | <i>Trichiurus</i> spp.         |
|    |                       | Grey mullet              | <i>Mugil cephalus</i>          |
| 21 | Mullets               | So-iuy mullet            | <i>Chelon haematocheilus</i>   |
|    |                       | Mullets                  | Mugilidae                      |
|    |                       | Filefishes               | Monacanthidae                  |
|    |                       | Barracudas               | Sphyraenidae                   |
|    |                       | Cichlids                 | Cichlidae                      |
|    |                       | Cobia                    | <i>Rachycentron canadum</i>    |
|    |                       | Flatfishes               | Pleuronectiformes              |
|    |                       | Flyingfishes             | Exocoetidae                    |
|    |                       | Formosan babylon         | <i>Babylonia formosae</i>      |
|    |                       | Giant perch              | <i>Lates calcarifer</i>        |
|    |                       | Golden threads           | <i>Nemipterus</i> spp.         |
|    |                       | Grass carp               | <i>Ctenopharyngodon idella</i> |
|    |                       | Halfbeaks                | Hemiramphidae                  |
|    |                       | Hard clam                | <i>Meretrix lusoria</i>        |
|    |                       | Japanese eel             | <i>Anguilla japonica</i>       |
|    |                       | Japanese seabass         | <i>Lateolabrax japonicus</i>   |
|    |                       | Lizardfishes             | Synodontidae                   |
| 22 | Miscellaneous (Misc.) | Milkfish                 | <i>Chanos chanos</i>           |
|    |                       | Monocle breams           | <i>Scolopsis</i> spp.          |
|    |                       | Moonfish                 | <i>Mene maculata</i>           |
|    |                       | Moray eels               | Muraenidae                     |
|    |                       | Oyster                   | <i>Crassostrea gigas</i>       |
|    |                       | Pacific saury            | <i>Cololabis saira</i>         |
|    |                       | Ponyfishes               | Leiognathidae                  |
|    |                       | Sea chubs                | Kyphosidae                     |
|    |                       | Sea urchin               | Echinoidea                     |
|    |                       | Sharp-toothed eel        | Muraenesocidae                 |
|    |                       | Short-necked clam        | <i>Tapes</i> spp.              |
|    |                       | Sillagos                 | Sillaginidae                   |
|    |                       | Spotted catfish          | <i>Arius maculatus</i>         |
|    |                       | Spotted scat             | <i>Scatophagus argus</i>       |
|    |                       | Surgeonfishes            | Acanthuridae                   |
|    |                       | Threadfins               | Polynemidae                    |
|    |                       | Tilefishes               | <i>Branchiostegus</i> spp.     |
|    |                       | Wolf-herrings            | Chirocentridae                 |

Other eels (Hag-fishes 、Conger eels 、Snake eels)  
 Other perches  
 Other marine fishes  
 Other shellfishes

Myxinidae;  
 Congridae;  
 Ophichthidae  
 Percidae

**Table 2.** Fishing speed criterion by gear type for the trawler fishery in Taiwan.

| Fishing Gear                              | Fishing Speed (Knot) |
|-------------------------------------------|----------------------|
| Otter Trawl (OT)                          | 1.7 ~ 4.5            |
| Pair Trawl (PT)                           | 1 ~ 5                |
| Pelagic Pair Trawl of Larval Anchovy (LA) | 0.6 ~ 3.4            |
| Shrimp Trawl (ST)                         | 2 ~ 4                |
| Sakura Shrimp Trawl (SKT)                 | 1.3 ~ 3.6            |
| Taiwan Mauxia Shrimp Trawl (TMT)          | 0.3 ~ 4.7            |

**Table 3.** The total sums of squares within the groups and the difference (percentages) for various groups of clusters. Six clusters were determined in this study.

| Cluster Number | Sum of Square | Difference    | Difference % |
|----------------|---------------|---------------|--------------|
| 1              | 9,528,575,118 |               |              |
| 2              | 4,442,181,793 | 5,086,393,325 | 0.551        |
| 3              | 2,623,854,726 | 1,818,327,067 | 0.197        |
| 4              | 1,695,827,629 | 928,027,097   | 0.100        |
| 5              | 1,033,636,435 | 662,191,194   | 0.072        |
| 6              | 714,261,892   | 319,374,543   | 0.035        |
| 7              | 569,015,230   | 145,246,662   | 0.016        |
| 8              | 457,511,593   | 111,503,637   | 0.012        |
| 9              | 376,557,832   | 80,953,761    | 0.009        |
| 10             | 303,959,878   | 72,597,954    | 0.008        |
| total          |               | 9,224,615,240 |              |
